# Supplementary material
Source: publisher figshare collection journal article supplement (https://acs.figshare.com/ndownloader/files/5073604)
Supplement: Supplementary file 1 [file 5073604]

data_General

#==============================================================================

_audit_creation_date                  '2004-12-03'
_audit_creation_method                'by teXsan for Windows v1.06'
_audit_update_record                   
;
?
;

#==============================================================================

# SUBMISSION DETAILS

_publ_requested_journal               ' ENTER JOURNAL NAME HERE'

_publ_requested_category            ' CHOOSE FI FM FO CI CM CO or AD'

_publ_contact_author_name           ' ENTER CONTACT NAME HERE'

_publ_contact_author_address
;
    ENTER ADDRESS
;
_publ_contact_letter
;
    ENTER TEXT OF LETTER
;

_publ_requested_coeditor_name          ?
_publ_contact_author_phone            ' ENTER PHONE NUMBER '
_publ_contact_author_fax              ' ENTER FAX NUMBER '
_publ_contact_author_email            ' ENTER EMAIL ADDRESS '

#==============================================================================

# PROCESSING SUMMARY (IUCr Office Use Only)

_journal_date_recd_electronic     ?
_journal_date_to_coeditor         ?
_journal_date_from_coeditor       ?
_journal_date_accepted            ?
_journal_date_printers_first      ?
_journal_date_printers_final      ?
_journal_date_proofs_out          ?
_journal_date_proofs_in           ?
_journal_coeditor_name            ?
_journal_coeditor_code            ?
_journal_coeditor_notes
; ?
;
_journal_techeditor_code          ?
_journal_techeditor_notes
; ?
;
_journal_coden_ASTM               ?
_journal_name_full                ?
_journal_year                     ?
_journal_volume                   ?
_journal_issue                    ?
_journal_page_first               ?
_journal_page_last                ?
_journal_suppl_publ_number        ?
_journal_suppl_publ_pages         ?

#==============================================================================

# TITLE AND AUTHOR LIST


_publ_section_title
;
    ENTER SECTION TITLE
;

_publ_section_title_footnote
;
    ENTER ANY FOOTNOTES TO TITLE
;
loop_
_publ_author_name
_publ_author_footnote
_publ_author_address
' FIRST AUTHORS NAME '
;
  FIRST AUTHORS FOOTNOTES
;
;
  FIRST AUTHORS ADDRESS
;

#==============================================================================

# TEXT


_publ_section_abstract
;
    ENTER ABSTRACT
;

_publ_section_exptl_refinement
;
    ENTER EXPERIMENTAL SECTION
;

_publ_section_comment
;
    ENTER TEXT
;

_publ_section_references
;
    ENTER OTHER REFERENCES

Molecular Structure Corporation. (1997-1999). teXsan for Windows.
Single Crystal Structure Analysis Software. Version 1.06.
MSC, 9009 New Trails Drive, The Woodlands, TX 77381, USA.

Altomare, A., Cascarano, M., 
Giacovazzo, C., Guagliardi, A. (1994). 
J. Appl. Cryst., 26, 343. 
;

_publ_section_acknowledgements
;
    ENTER ACKNOWLEDGEMENTS
;

_publ_section_table_legends
;
    ENTER TABLE LEGENDS
;

_publ_section_figure_captions
;
    ENTER FIGURE CAPTIONS
;

#==============================================================================

data__Template_texray.inf

#==============================================================================

_computing_data_collection            'MSC/AFC Diffractometer Control'
_computing_cell_refinement            'MSC/AFC Diffractometer Control'
_computing_data_reduction             'teXsan for Windows version 1.06 (MSC, 1997-1999)'
_computing_structure_solution          
;
SIR92 (Altomare, et. al. 1994)
;
_computing_structure_refinement       'teXsan for Windows version 1.06 (MSC, 1997-1999)'
_computing_publication_material       'teXsan for Windows version 1.06 (MSC, 1997-1999)'
#------------------------------------------------------------------------------
_cell_length_a                         9.10550(10)
_cell_length_b                         12.1593(2)
_cell_length_c                         6.19830(10)
_cell_angle_alpha                      90
_cell_angle_beta                       104.2818(7)
_cell_angle_gamma                      90
_cell_volume                           665.04(2)
_cell_formula_units_Z                  2
_cell_measurement_temperature          296.2
_cell_measurement_reflns_used          0
_cell_measurement_theta_min            0.0
_cell_measurement_theta_max            0.0
#------------------------------------------------------------------------------
_symmetry_cell_setting                 monoclinic
_symmetry_space_group_name_H-M        'P 21/a     '
_symmetry_Int_Tables_number            14
_symmetry_space_group_name_Hall        ?
loop_
_symmetry_equiv_pos_as_xyz
  '   +x,   +y,   +z'
  '1/2-x,1/2+y,   -z'
  '   -x,   -y,   -z'
  '1/2+x,1/2-y,   +z'
#------------------------------------------------------------------------------

_publ_section_exptl_prep
;
    ENTER EXPERIMENTAL SECTION
;
_exptl_crystal_description            'NONE'
_exptl_crystal_colour                 'NONE'
_exptl_crystal_size_max                0.00
_exptl_crystal_size_mid                0.00
_exptl_crystal_size_min                0.00
_exptl_crystal_density_diffrn          2.601
_exptl_crystal_density_meas            'not measured'
_chemical_formula_weight               520.91
_chemical_formula_analytical           ?
_chemical_formula_sum                  'H12 Cu K2 O14 S2 Se '
_chemical_formula_moiety               '?'
_chemical_formula_structural           ?
_chemical_compound_source              ?
_exptl_crystal_F_000                   514.00
_exptl_absorpt_coefficient_mu          5.389
_exptl_absorpt_correction_type         none
_exptl_special_details
;
The scan width was (0.00+0.00tan\q)\% with an \w
scan speed of 0\% per minute 
.
Stationary background counts were recorded at each end of the
scan, and the scan time:background time ratio was 2:1.
;

#==============================================================================

# EXPERIMENTAL DATA

_diffrn_special_details
;
 ?
;
_diffrn_ambient_temperature            296.2
_diffrn_radiation_wavelength           0.7107
_diffrn_radiation_type                 'Mo K\a'
_diffrn_radiation_source              'Rigaku rotating anode'
_diffrn_radiation_monochromator        graphite
_diffrn_radiation_detector            'scintillation counter'
_diffrn_measurement_device            'Rigaku AFC7'
_diffrn_measurement_method            \w-2\q

_diffrn_standards_number              0
_diffrn_standards_interval_count      0
_diffrn_standards_decay_%             0.00
loop_
_diffrn_standard_refln_index_h
_diffrn_standard_refln_index_k
_diffrn_standard_refln_index_l
 

_diffrn_reflns_number                  6151
_reflns_number_total                   3349
_reflns_number_gt                      2589
_reflns_threshold_expression           I>4.00\s(I)
_diffrn_reflns_av_R_equivalents        0.01409
_diffrn_reflns_av_sigmaI/netI          0.046
_diffrn_reflns_limit_h_min             -15
_diffrn_reflns_limit_h_max             15
_diffrn_reflns_limit_k_min             -20
_diffrn_reflns_limit_k_max             20
_diffrn_reflns_limit_l_min             -10
_diffrn_reflns_limit_l_max             10
_diffrn_reflns_theta_min               1.67
_diffrn_reflns_theta_max               36.32
_diffrn_reflns_reduction_process      'Lp corrections applied'
_diffrn_orient_matrix_UB_11            0.00000
_diffrn_orient_matrix_UB_12            0.00000
_diffrn_orient_matrix_UB_13            0.00000
_diffrn_orient_matrix_UB_21            0.00000
_diffrn_orient_matrix_UB_22            0.00000
_diffrn_orient_matrix_UB_23            0.00000
_diffrn_orient_matrix_UB_31            0.00000
_diffrn_orient_matrix_UB_32            0.00000
_diffrn_orient_matrix_UB_33            0.00000
#------------------------------------------------------------------------------
loop_
_atom_type_symbol
_atom_type_oxidation_number
_atom_type_number_in_cell
_atom_type_scat_dispersion_real
_atom_type_scat_dispersion_imag
_atom_type_scat_source
  H  0    24 0.000 0.000 
;International Tables for Crystallography
(1992, Vol. C, Table 6.1.1.2)
;
  O  0    28 0.008 0.006 
;International Tables for Crystallography
(1992, Vol. C, Table 6.1.1.2)
;
  S  0     4 0.110 0.124 
;International Tables for Crystallography
(1992, Vol. C, Table 6.1.1.2)
;
  Cu 0     2 0.263 1.266 
;International Tables for Crystallography
(1992, Vol. C, Tables 4.2.6.8 and 6.1.1.1)
;
  Se 0     2 -0.178 2.223 
;International Tables for Crystallography
(1992, Vol. C, Tables 4.2.6.8 and 6.1.1.1)
;
  K  0     4 0.179 0.250 
;International Tables for Crystallography
(1992, Vol. C, Table 6.1.1.2)
;

#==============================================================================

# ATOMIC COORDINATES AND THERMAL PARAMETERS

loop_
_atom_site_label
_atom_site_fract_x
_atom_site_fract_y
_atom_site_fract_z
_atom_site_U_iso_or_equiv
_atom_site_occupancy
_atom_site_refinement_flags
_atom_site_adp_type
_atom_site_calc_flag
_atom_site_calc_attached_atom
Se(2) 0.4160(4) 0.1329(4) 0.7441(6) 0.0112(3) 0.215   S Uani d ?
Cu(1) 0.0000 0.0000 0.0000 0.01795(5) 0.500   S Uani d ?
K(10) 0.12660(3) 0.34609(3) 0.34222(5) 0.03225(8) 1.000   .  Uani d ?
S(2) 0.3976(3) 0.1386(3) 0.7112(4) 0.0149(3) 0.7853(8)   SP Uani d ?
O(3) 0.3966(4) 0.2379(3) 0.5835(5) 0.0337(6) 0.785   SP Uani d ?
O(4) 0.5433(3) 0.0753(4) 0.7478(6) 0.0366(6) 0.785   SP Uani d ?
O(5) 0.2754(6) 0.0679(3) 0.6162(9) 0.0253(6) 0.785   SP Uani d ?
O(6) 0.3874(5) 0.1662(4) 0.9452(6) 0.0273(6) 0.785   SP Uani d ?
O(7) 0.16267(10) 0.11326(9) 0.1662(2) 0.0315(3) 1.000   .  Uani d ?
O(8) -0.18343(11) 0.11647(9) 0.0354(2) 0.0316(2) 1.000   .  Uani d ?
O(9) -0.00463(10) -0.06367(8) 0.2850(1) 0.0229(2) 1.000   .  Uani d ?
O(10) 0.415(2) 0.2339(12) 0.571(2) 0.041(2) 0.215   SP Uani d ?
O(11) 0.5720(10) 0.0731(12) 0.727(2) 0.0208(12) 0.215   SP Uani d ?
O(12) 0.271(2) 0.0458(9) 0.601(3) 0.0119(12) 0.215   SP Uani d ?
O(13) 0.399(2) 0.1812(12) 0.985(2) 0.017(2) 0.215   SP Uani d ?
H(15) 0.181(3) 0.091(2) 0.272(4) 0.108(9) 1.000   .  Uiso d ?
H(16) 0.246(2) 0.127(2) 0.123(3) 0.055(5) 1.000   .  Uiso d ?
H(17) -0.276(1) 0.1187(11) -0.048(2) 0.015(3) 1.000   .  Uiso d ?
H(18) -0.131(2) 0.185(2) 0.044(3) 0.086(7) 1.000   .  Uiso d ?
H(19) -0.065(2) -0.0590(13) 0.317(2) 0.020(4) 1.000   .  Uiso d ?
H(20) 0.013(2) -0.133(2) 0.331(3) 0.044(5) 1.000   .  Uiso d ?

loop_
_atom_site_aniso_label
_atom_site_aniso_U_11
_atom_site_aniso_U_22
_atom_site_aniso_U_33
_atom_site_aniso_U_12
_atom_site_aniso_U_13
_atom_site_aniso_U_23
 Se(2)  0.0090(7)   0.0149(5)   0.0060(8)   -0.0002(5)  -0.0054(5)  0.0036(5)  
 Cu(1)  0.01815(9)  0.01923(10) 0.01672(9)  -0.00208(7) 0.00476(7)  0.00055(7) 
 K(10)  0.0332(1)   0.0344(2)   0.0311(1)   -0.00197(12) 0.01158(11) -0.00134(12)
 S(2)   0.0123(6)   0.0212(4)   0.0088(6)   0.0010(4)   -0.0021(4)  0.0016(4)  
 O(3)   0.0442(13)  0.0317(13)  0.0239(9)   -0.0096(10) 0.0057(10)  -0.0002(8) 
 O(4)   0.0155(12)  0.0550(11)  0.0425(12)  0.0075(11)  0.0131(8)   -0.0104(9) 
 O(5)   0.0285(9)   0.018(2)    0.0314(11)  -0.0091(11) 0.0105(8)   -0.0086(11)
 O(6)   0.0381(10)  0.029(2)    0.015(1)    -0.0086(10) 0.0070(11)  -0.0113(8) 
 O(7)   0.0278(5)   0.0417(6)   0.0252(5)   -0.0032(4)  0.0068(4)   0.0053(4)  
 O(8)   0.0312(5)   0.0308(5)   0.0322(5)   -0.0042(4)  0.0067(4)   0.0022(4)  
 O(9)   0.0229(4)   0.0260(5)   0.0223(4)   0.0010(4)   0.0104(3)   0.0021(3)  
 O(10)  0.059(5)    0.013(3)    0.071(6)    -0.010(3)   0.057(4)    -0.006(3)  
 O(11)  0.000(2)    0.045(3)    0.026(2)    0.009(2)    0.019(2)    -0.005(2)  
 O(12)  0.014(2)    -0.000(3)   0.020(2)    -0.010(2)   0.001(2)    -0.011(2)  
 O(13)  0.035(3)    0.014(3)    0.003(3)    -0.006(2)   0.004(2)    -0.018(2)  

#==============================================================================

# REFINEMENT DATA

_refine_special_details
;
 ?
;
_refine_ls_structure_factor_coef       F
_refine_ls_matrix_type                 full
_refine_ls_weighting_scheme            sigma
_refine_ls_weighting_details           'w = 1/[\s^2^(Fo)]'
_refine_ls_hydrogen_treatment          refall
_refine_ls_extinction_method           none
_refine_ls_extinction_coef             ?
_refine_ls_abs_structure_details       ?
_refine_ls_abs_structure_Flack         ?
_refine_ls_number_reflns               2589
_refine_ls_number_parameters           158
_refine_ls_number_restraints           0
_refine_ls_number_constraints          9
_refine_ls_R_factor_all                0.0296
_refine_ls_R_factor_gt                 0.0300
_refine_ls_wR_factor_all               0.0410
_refine_ls_wR_factor_ref               0.0410
_refine_ls_goodness_of_fit_all         2.617
_refine_ls_goodness_of_fit_ref         2.620
_refine_ls_shift/su_max                0.0100
_refine_ls_shift/su_mean               0.0014
_refine_diff_density_min               0.00
_refine_diff_density_max               0.00

#==============================================================================

# MOLECULAR GEOMETRY

_geom_special_details
;
 ?
;
loop_
_geom_bond_atom_site_label_1
_geom_bond_atom_site_label_2
_geom_bond_distance
_geom_bond_site_symmetry_1
_geom_bond_site_symmetry_2
_geom_bond_publ_flag
       ?  ?    ?      ? ?  ?
# -- ENTER BONDS HERE, ONE PER LINE --
# e.g. C1 C2 1.541(1) . . yes
#------------------------------------------------------------------------------
loop_
_geom_angle_atom_site_label_1
_geom_angle_atom_site_label_2
_geom_angle_atom_site_label_3
_geom_angle
_geom_angle_site_symmetry_1
_geom_angle_site_symmetry_2
_geom_angle_site_symmetry_3
_geom_angle_publ_flag
# -- ENTER ANGLES HERE, ONE PER LINE --
# e.g. C1 C2 C3 109.4(3) . . . yes
       ?  ?  ?     ?     ? ? ?  ?
#------------------------------------------------------------------------------
loop_
_geom_contact_atom_site_label_1
_geom_contact_atom_site_label_2
_geom_contact_distance
_geom_contact_site_symmetry_1
_geom_contact_site_symmetry_2
_geom_contact_publ_flag
 K10       O12       2.59(2)    . 2_556 no
 K10       O13       2.65(2)    . 4_454 no
 K10       O11       2.73(2)    . 4_455 no
 K10       H17       2.80(2)    . 4 no
 K10       O5        2.832(6)   . 2_556 no
 K10       O10       2.83(2)    . 4_455 no
 K10       O6        2.860(6)   . 4_454 no
 K10       O3        2.863(6)   . . no
 K10       O8        2.905(2)   . 4 no
 K10       O4        2.958(5)   . 4_455 no
 K10       O10       2.98(3)    . . no
 K10       O3        3.035(7)   . 4_455 no
 K10       O7        3.081(2)   . . no
 K10       O4        3.170(7)   . 2_556 no
 K10       O11       3.27(2)    . 2_556 no
 O3        H20       1.79(3)    . 2_556 no
 O3        O9        2.656(6)   . 2_556 no
 O3        O7        3.288(5)   . . no
 O4        H17       1.89(2)    . 1_656 no
 O4        O8        2.726(6)   . 1_656 no
 O4        O11       3.39(2)    . 3_656 no
 O4        O12       3.39(3)    . 3_656 no
 O5        H19       2.06(2)    . 3_556 no
 O5        H15       2.11(4)    . . no
 O5        O9        2.684(9)   . 3_556 no
 O5        O7        2.780(9)   . . no
 O5        H20       2.84(3)    . 3_556 no
 O5        O9        3.270(6)   . . no
 O5        O11       3.29(2)    . 3_656 no
 O5        O8        3.359(8)   . 3_556 no
 O6        H18       1.93(4)    . 4_556 no
 O6        H16       1.95(3)    . 1_556 no
 O6        O7        2.804(8)   . 1_556 no
 O6        O8        2.809(6)   . 4_556 no
 O7        O12       2.76(3)    . . no
 O7        O13       2.79(3)    . 1_554 no
 O7        O11       3.26(2)    . 3_656 no
 O7        O10       3.30(2)    . . no
 O8        O11       2.61(2)    . 1_454 no
 O8        O13       2.61(2)    . 4_454 no
 O8        O12       3.24(3)    . 3_556 no
 O9        O10       2.68(2)    . 2_546 no
 O9        O12       2.69(3)    . 3_556 no
 O9        H19       2.82(2)    . 3_556 no
 O9        O9        3.065(3)   . 3_556 no
 O9        O12       3.08(2)    . . no
 O10       H20       1.80(4)    . 2_556 no
 O10       H19       2.87(3)    . 2_556 no
 O11       H17       1.80(3)    . 1_656 no
 O11       O12       3.12(3)    . 3_656 no
 O11       O11       3.31(4)    . 3_656 no
 O12       H19       2.06(3)    . 3_556 no
 O12       H15       2.07(5)    . . no
 O13       H18       1.70(5)    . 4_556 no
 O13       H16       1.93(4)    . 1_556 no
#------------------------------------------------------------------------------
loop_
_geom_torsion_atom_site_label_1
_geom_torsion_atom_site_label_2
_geom_torsion_atom_site_label_3
_geom_torsion_atom_site_label_4
_geom_torsion_site_symmetry_1
_geom_torsion_site_symmetry_2
_geom_torsion_site_symmetry_3
_geom_torsion_site_symmetry_4
_geom_torsion
_geom_torsion_publ_flag
 SE2 S2 O3 O4 . . . . 52.9(39) no
 SE2 S2 O3 O5 . . . . 177.2(44) no
 SE2 S2 O3 O6 . . . . -62.4(39) no
 SE2 S2 O3 O10 . . . . 70.2(86) no
 SE2 S2 O4 O5 . . . . 112.6(41) no
 SE2 S2 O4 O6 . . . . -1.8(37) no
 SE2 S2 O4 O10 . . . . -123.6(42) no
 SE2 S2 O4 O11 . . . . -141.6(91) no
 SE2 S2 O4 O12 . . . . 112.9(42) no
 SE2 S2 O5 O6 . . . . 60.7(35) no
 SE2 S2 O5 O10 . . . . -169.2(41) no
 SE2 S2 O5 O12 . . . . -53(13) no
 SE2 S2 O6 O13 . . . . 78(12) no
 SE2 S2 O10 O11 . . . . 50.4(39) no
 SE2 O3 O4 O5 . . . . 42.8(6) no
 SE2 O3 O4 O6 . . . . -28.0(5) no
 SE2 O3 O4 O10 . . . . 171.6(85) no
 SE2 O3 O4 O11 . . . . 176.8(55) no
 SE2 O3 O4 O12 . . . . 46.6(9) no
 SE2 O3 O5 O6 . . . . 36.6(5) no
 SE2 O3 O5 O10 . . . . -78.8(78) no
 SE2 O3 O5 O12 . . . . -101(12) no
 SE2 O3 O6 O13 . . . . 141.7(76) no
 SE2 O3 O10 O11 . . . . -5.0(54) no
 SE2 O4 O5 O6 . . . . -29.6(5) no
 SE2 O4 O5 O10 . . . . 45.8(8) no
 SE2 O4 O5 O12 . . . . -170.3(83) no
 SE2 O4 O6 O13 . . . . -137.5(86) no
 SE2 O4 O10 O11 . . . . -177.5(54) no
 SE2 O5 O6 O13 . . . . 99(57) no
 SE2 O5 O10 O11 . . . . 41.1(8) no
 S2 O3 O4 O5 . . . . 32.1(4) no
 S2 O3 O4 O6 . . . . -38.7(4) no
 S2 O3 O4 O10 . . . . 160.9(85) no
 S2 O3 O4 O11 . . . . 166.1(54) no
 S2 O3 O4 O12 . . . . 35.9(8) no
 S2 O3 O5 O6 . . . . 36.1(5) no
 S2 O3 O5 O10 . . . . -79.3(78) no
 S2 O3 O5 O12 . . . . -102(13) no
 S2 O3 O6 O13 . . . . 152.7(76) no
 S2 O3 O10 O11 . . . . -11.4(57) no
 S2 O4 O5 O6 . . . . -41.0(4) no
 S2 O4 O5 O10 . . . . 34.4(7) no
 S2 O4 O5 O12 . . . . 178.3(83) no
 S2 O4 O6 O13 . . . . -137.1(85) no
 S2 O4 O10 O11 . . . . -168.0(53) no
 S2 O5 O6 O13 . . . . 87(57) no
 S2 O5 O10 O11 . . . . 43.3(9) no
 O3 O4 O5 O6 . . . . -71.4(3) no
 O3 O4 O5 O10 . . . . 3.9(7) no
 O3 O4 O5 O12 . . . . 147.9(81) no
 O3 O4 O6 O13 . . . . -104.4(84) no
 O3 O4 O10 O11 . . . . 174.9(96) no
 O3 O5 O6 O13 . . . . 54(57) no
 O3 O5 O10 O11 . . . . 137.0(80) no
 O4 O5 O6 O13 . . . . 127(57) no
 O4 O5 O10 O11 . . . . 5.6(6) no
#------------------------------------------------------------------------------

#==============================================================================
# Additional structures and associated data_? identifiers
# should be added at this point if there is more than one 
# structure analysis in the CIF.
#==============================================================================
#     End of CIF
#==============================================================================
